# Supplementary material
Source: PubMed Central journal article supplement (PMC10991641)
Supplement: 262_2022_3216_MOESM1_ESM.pdf [file 262_2022_3216_MOESM1_ESM.pdf]

## **Supplementary Information for**

### **Near-infrared photoimmunotherapy induced tumor cell death enhances tumor dendritic cell migration**

**Taiki Moriya, Mayuko Hashimoto, Hina Matsushita, Shion Masuyama, Rina Yoshida, Ryuhei Okada, Aki Furusawa, Daiki Fujimura, Hiroaki Wakiyama, Takuya Kato, Peter L Choyke, Yutaka Kusumoto, Tatyana Chtanova, Hisataka Kobayashi, and Michio Tomura**

**Supplementary Fig. 1; related to Fig. 2  
Gating strategies for DC subsets in dLN.**

**Supplementary Fig. 2; related to Fig. 3  
Enhanced Ti-DC migration induced by NIR-PIT is inhibited by blocking of ATP-P2X7R and G $\alpha$ i signaling pathways.**

**Supplementary Table 1; related to Materials and methods  
Antibodies for flow cytometry.**

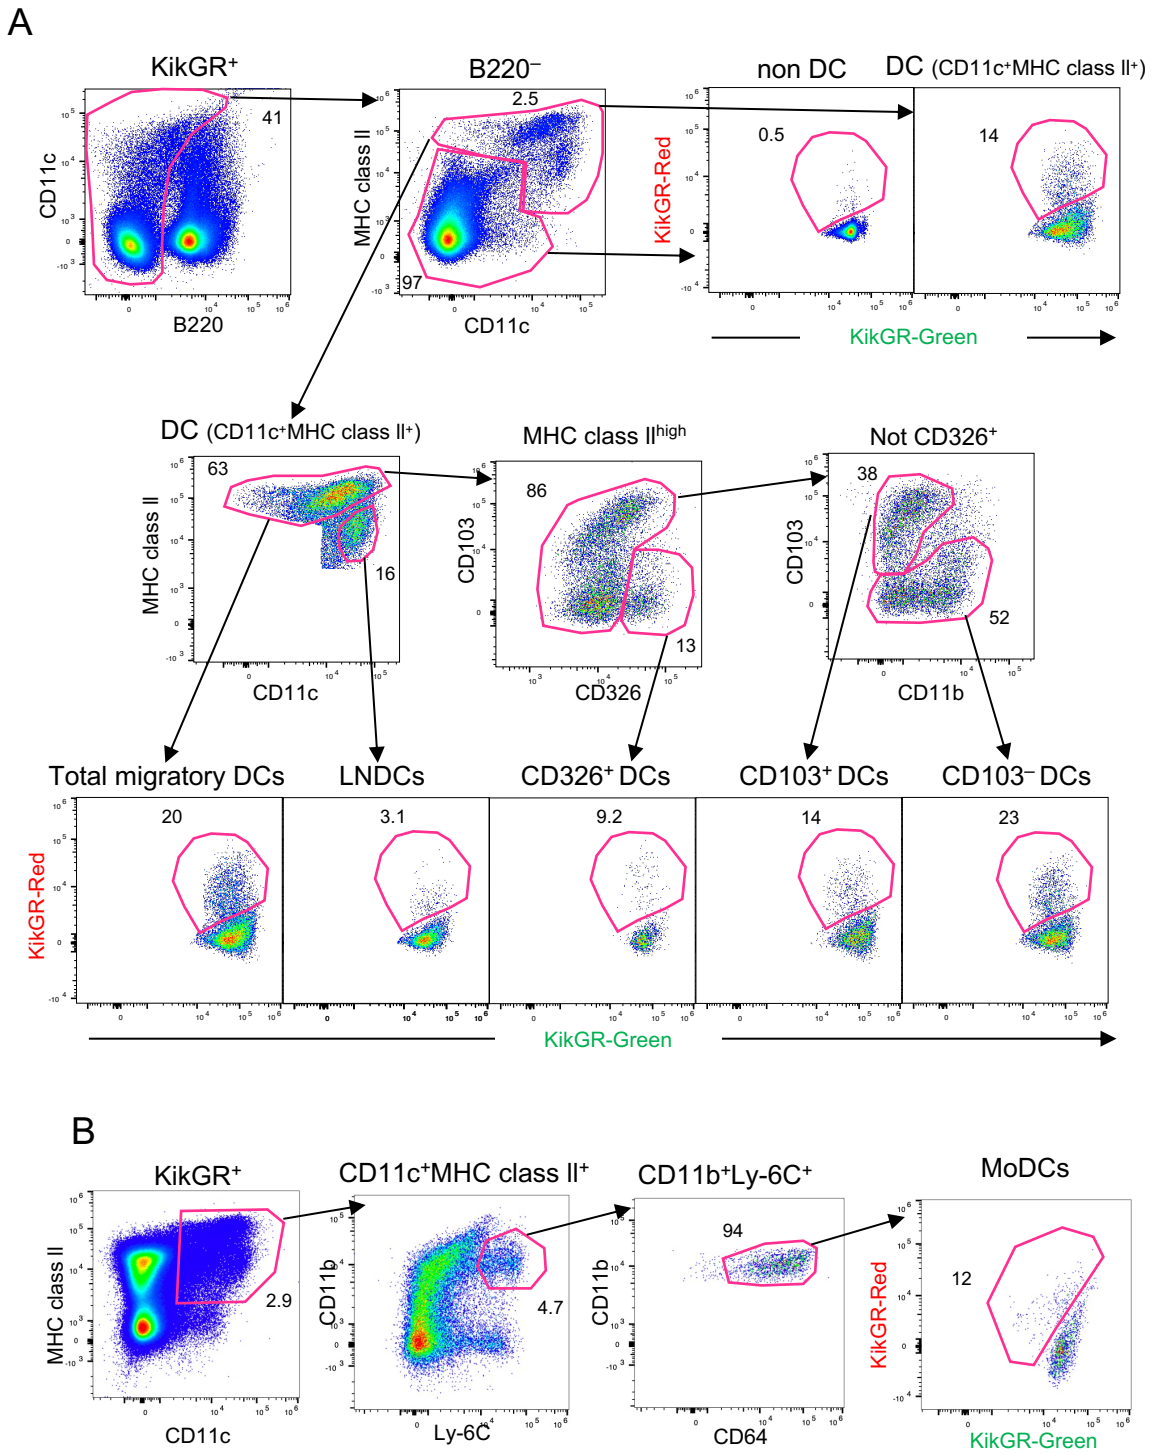

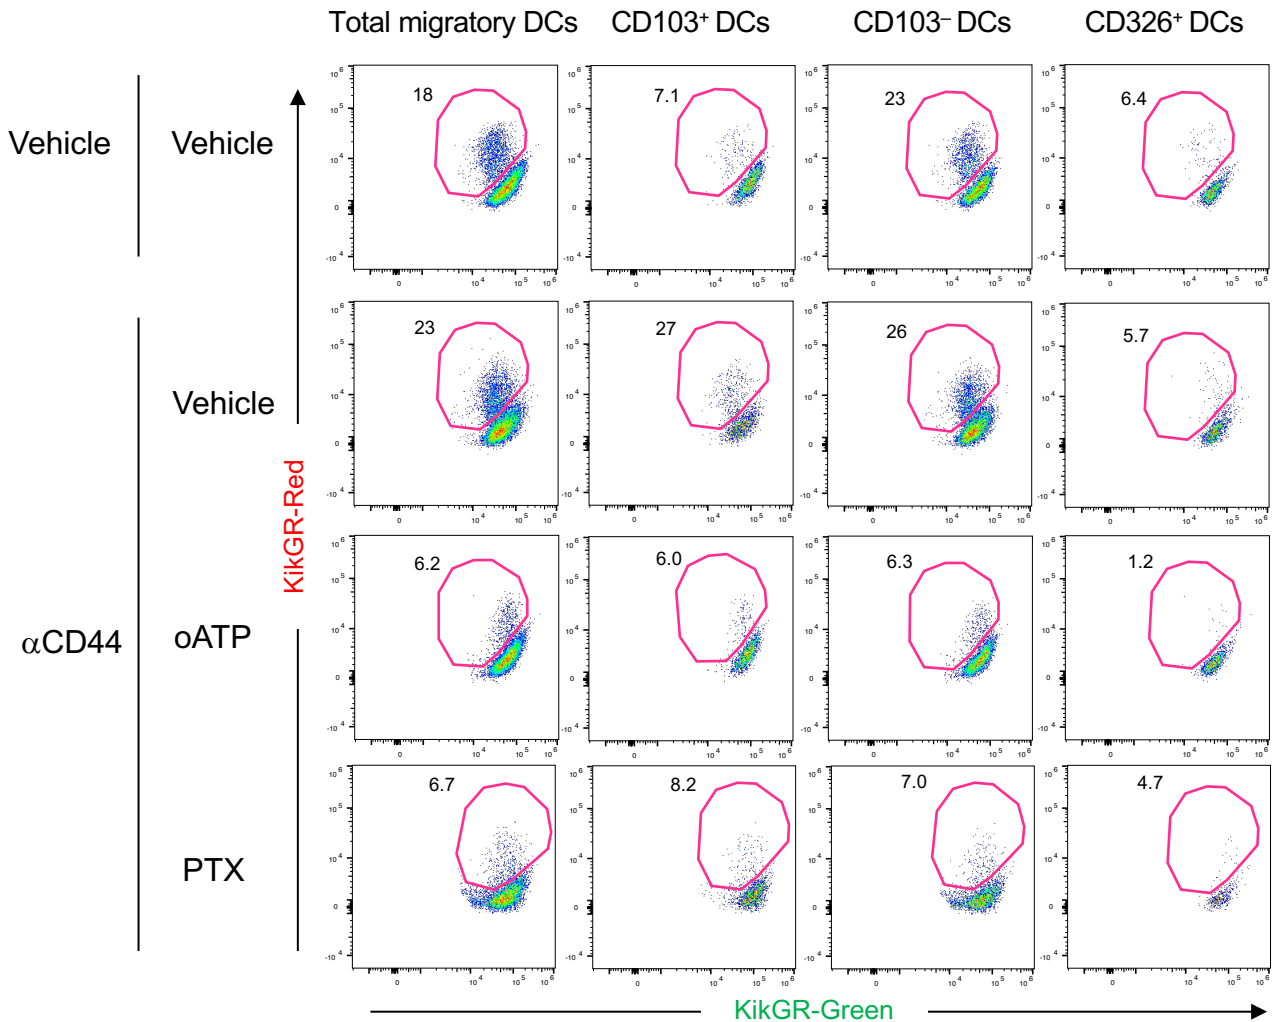

**Supplementary Fig. 2 related to Fig. 3. Enhanced Ti-DC migration induced by NIR-PIT is inhibited by blocking of ATP-P2X7R and Gαi signaling pathways.**

Representative flow cytometry plots of total migratory, CD103<sup>+</sup>, CD103<sup>-</sup>, CD326<sup>+</sup> DCs in dLNs of tumors inoculated in KikGR mice 24 hours following NIR light and violet light irradiation of tumors and indicated treatments. Numbers in dot plots indicate frequencies of gated population (%) of parent population. Data are representative of two independent experiments.

**Supplementary Table 1 related to Materials and methods.  
Antibodies for flow cytometry.**

| Antibody     | Clone         | Fluorochrome                    |
|--------------|---------------|---------------------------------|
| CD11b        | M1/70         | PerCP-Cy5.5                     |
| CD11c        | N418          | APC                             |
| CD45R (B220) | RA3-6B2       | AlexaFluor 700                  |
| CD64         | X54-5/7.1     | Brilliant Violet 421            |
| CD103        | 2E7           | Brilliant Violet 421 / APC-R700 |
| CD326        | G8.8          | APC-Cy7                         |
| I-A/I-E      | M5/114. 15. 2 | PE-Cy7 / Brilliant Violet 510   |
| Ly-6C        | HK1.4         | APC-Cy7                         |
